# Supplementary material for: Gut relief formula attenuates dextran sulfate sodium-induced colitis by regulating NF-κB signaling and the intestinal microbiota in mice
Source: Royal Society of Chemistry journal article supplement (doi:10.1039/d1fo01477c), 2021-01-01
Supplement: d1fo01477c1.pdf [file d1fo01477c1.pdf]

## Supplementary Materials

### Gut relief formula attenuates dextran sulfate sodium-induced colitis by regulating NF- $\kappa$ B signaling and the intestinal microbiota in mice

Xuemeng Si<sup>1</sup>, Ning Liu<sup>1,2</sup>, Hai Jia<sup>1</sup>, Jiaqi Wang<sup>3</sup>, Lina Pan<sup>3</sup>, Ling Dong<sup>3</sup>, Zhixing Rong<sup>3</sup>, Ying

Yang<sup>1</sup>, and Zhenlong Wu<sup>1,2\*</sup>

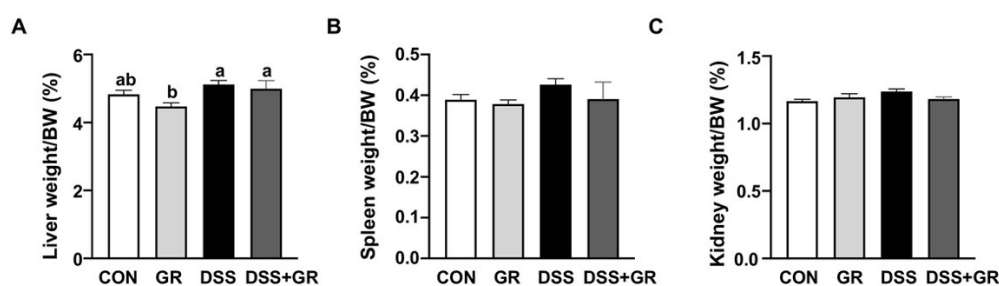

#### Supplementary Figure 1.

The organ indexes were calculated as organ weight (g)/mouse body weight (g), respectively. (A-C) Liver weight, spleen weight, and kidney weight as a percentage of body weight. Values are means  $\pm$  SEM, n = 12. The letters (a-c) indicated the significant differences of all treatment groups ( $P < 0.05$ )

**Supplementary Table 1. Primer sequences used in Real-time PCR.**

| <b>Gene</b>   | <b>Forward primer (5' to 3')</b> | <b>Reverse primer (5' to 3')</b> |
|---------------|----------------------------------|----------------------------------|
| GSS           | CCGACACGTTCTCAATGTCC             | GGCACGCTGGTCAAATATGT             |
| Nrf2          | TCCATTTACGGAGACCCACC             | GGCCGTTCTGTTTGACACTT             |
| NQO1          | GTAGCGGCTCCATGTA CTCT            | AGGATGCCACTCTGAATCGG             |
| IL-1 $\beta$  | CAGGCAGGCAGTATCACTCA             | TGTCCTCATCCTGGAAGGTC             |
| IL-6          | CTGATGCTGGTGACAACCAC             | TCCACGATTTCCAGAGAAC              |
| TNF- $\alpha$ | CCACCACGCTCTTCTGTCTA             | GGTCTGGGCCATAGA ACTGA            |
| IL-10         | CCAGGGAGATCCTTTGATGA             | AACTGGCCACAGTTTTCAGG             |
| IL-18         | GCCTCAAACCTTCAAATCA              | TGGATCCATTTCCTCAAAGG             |
| CCL-2         | CCCAATGAGTAGGCTGGAGA             | TCTGGACCCATTCTTCTTG              |
| CCL-3         | ACCTGGA ACTGAATGCCTGA            | GTCCCTCGATGTGGCTACTT             |
| CCL-8         | GTCACCTGCTGCTTTCATGT             | CCCTGCTTGGTCTGGAAAAC             |
| GAPDH         | AAGCCATCACCATCTTCCA              | CACCAGTAGACTCCACGACA             |
